# Supplementary material for: Observation of osmotically driven, highly controllable and reconfigurable oil/water phase separation
Source: Royal Society of Chemistry journal article supplement (doi:10.1039/c9sc01649j), 2019-01-01
Supplement: c9sc01649j3.pdf [file c9sc01649j3.pdf]

# Using salt to mix oil and water

Conventional oils have limited solubility...

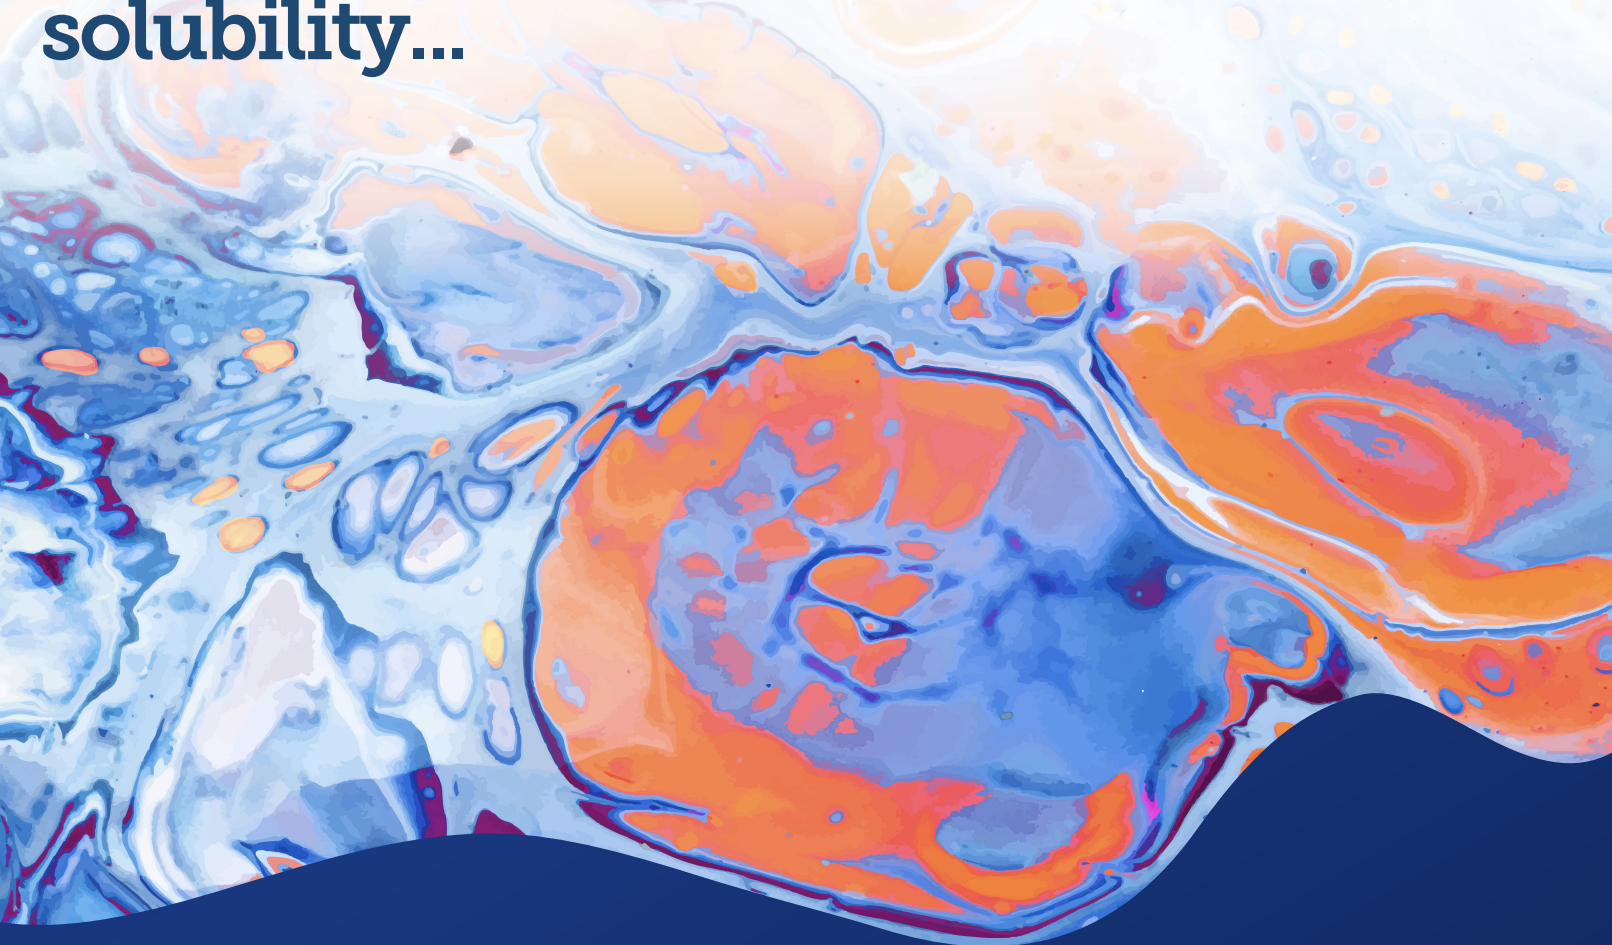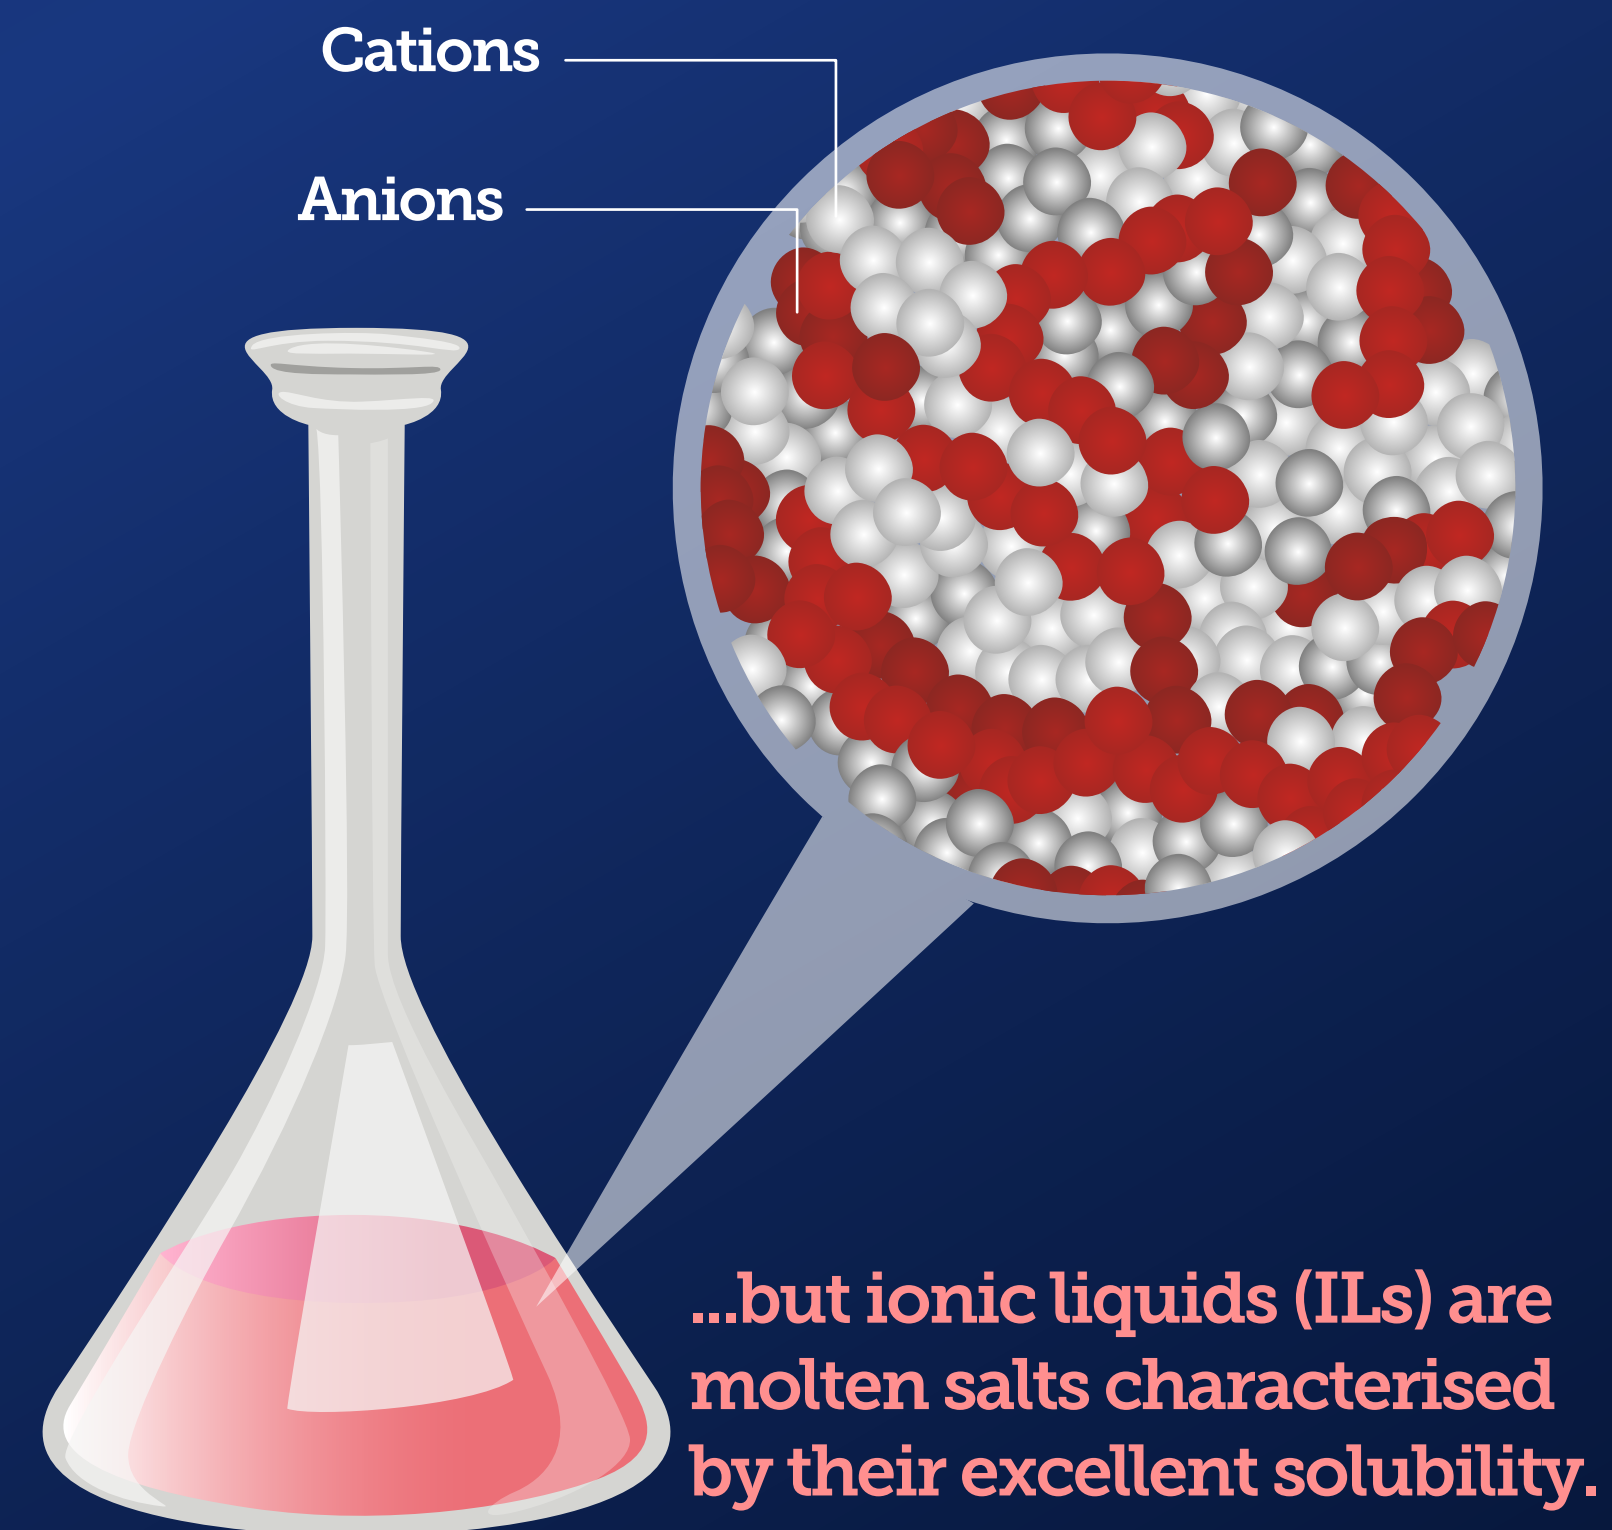

IL oil homogeneous solution  
( $C_n$ vim[Tf<sub>2</sub>N]-LiTf<sub>2</sub>N)

Diverse structures can be obtained depending on LiTf<sub>2</sub>N concentration and alkyl length.

By increasing salt concentration, complex water/oil drops can be generated.

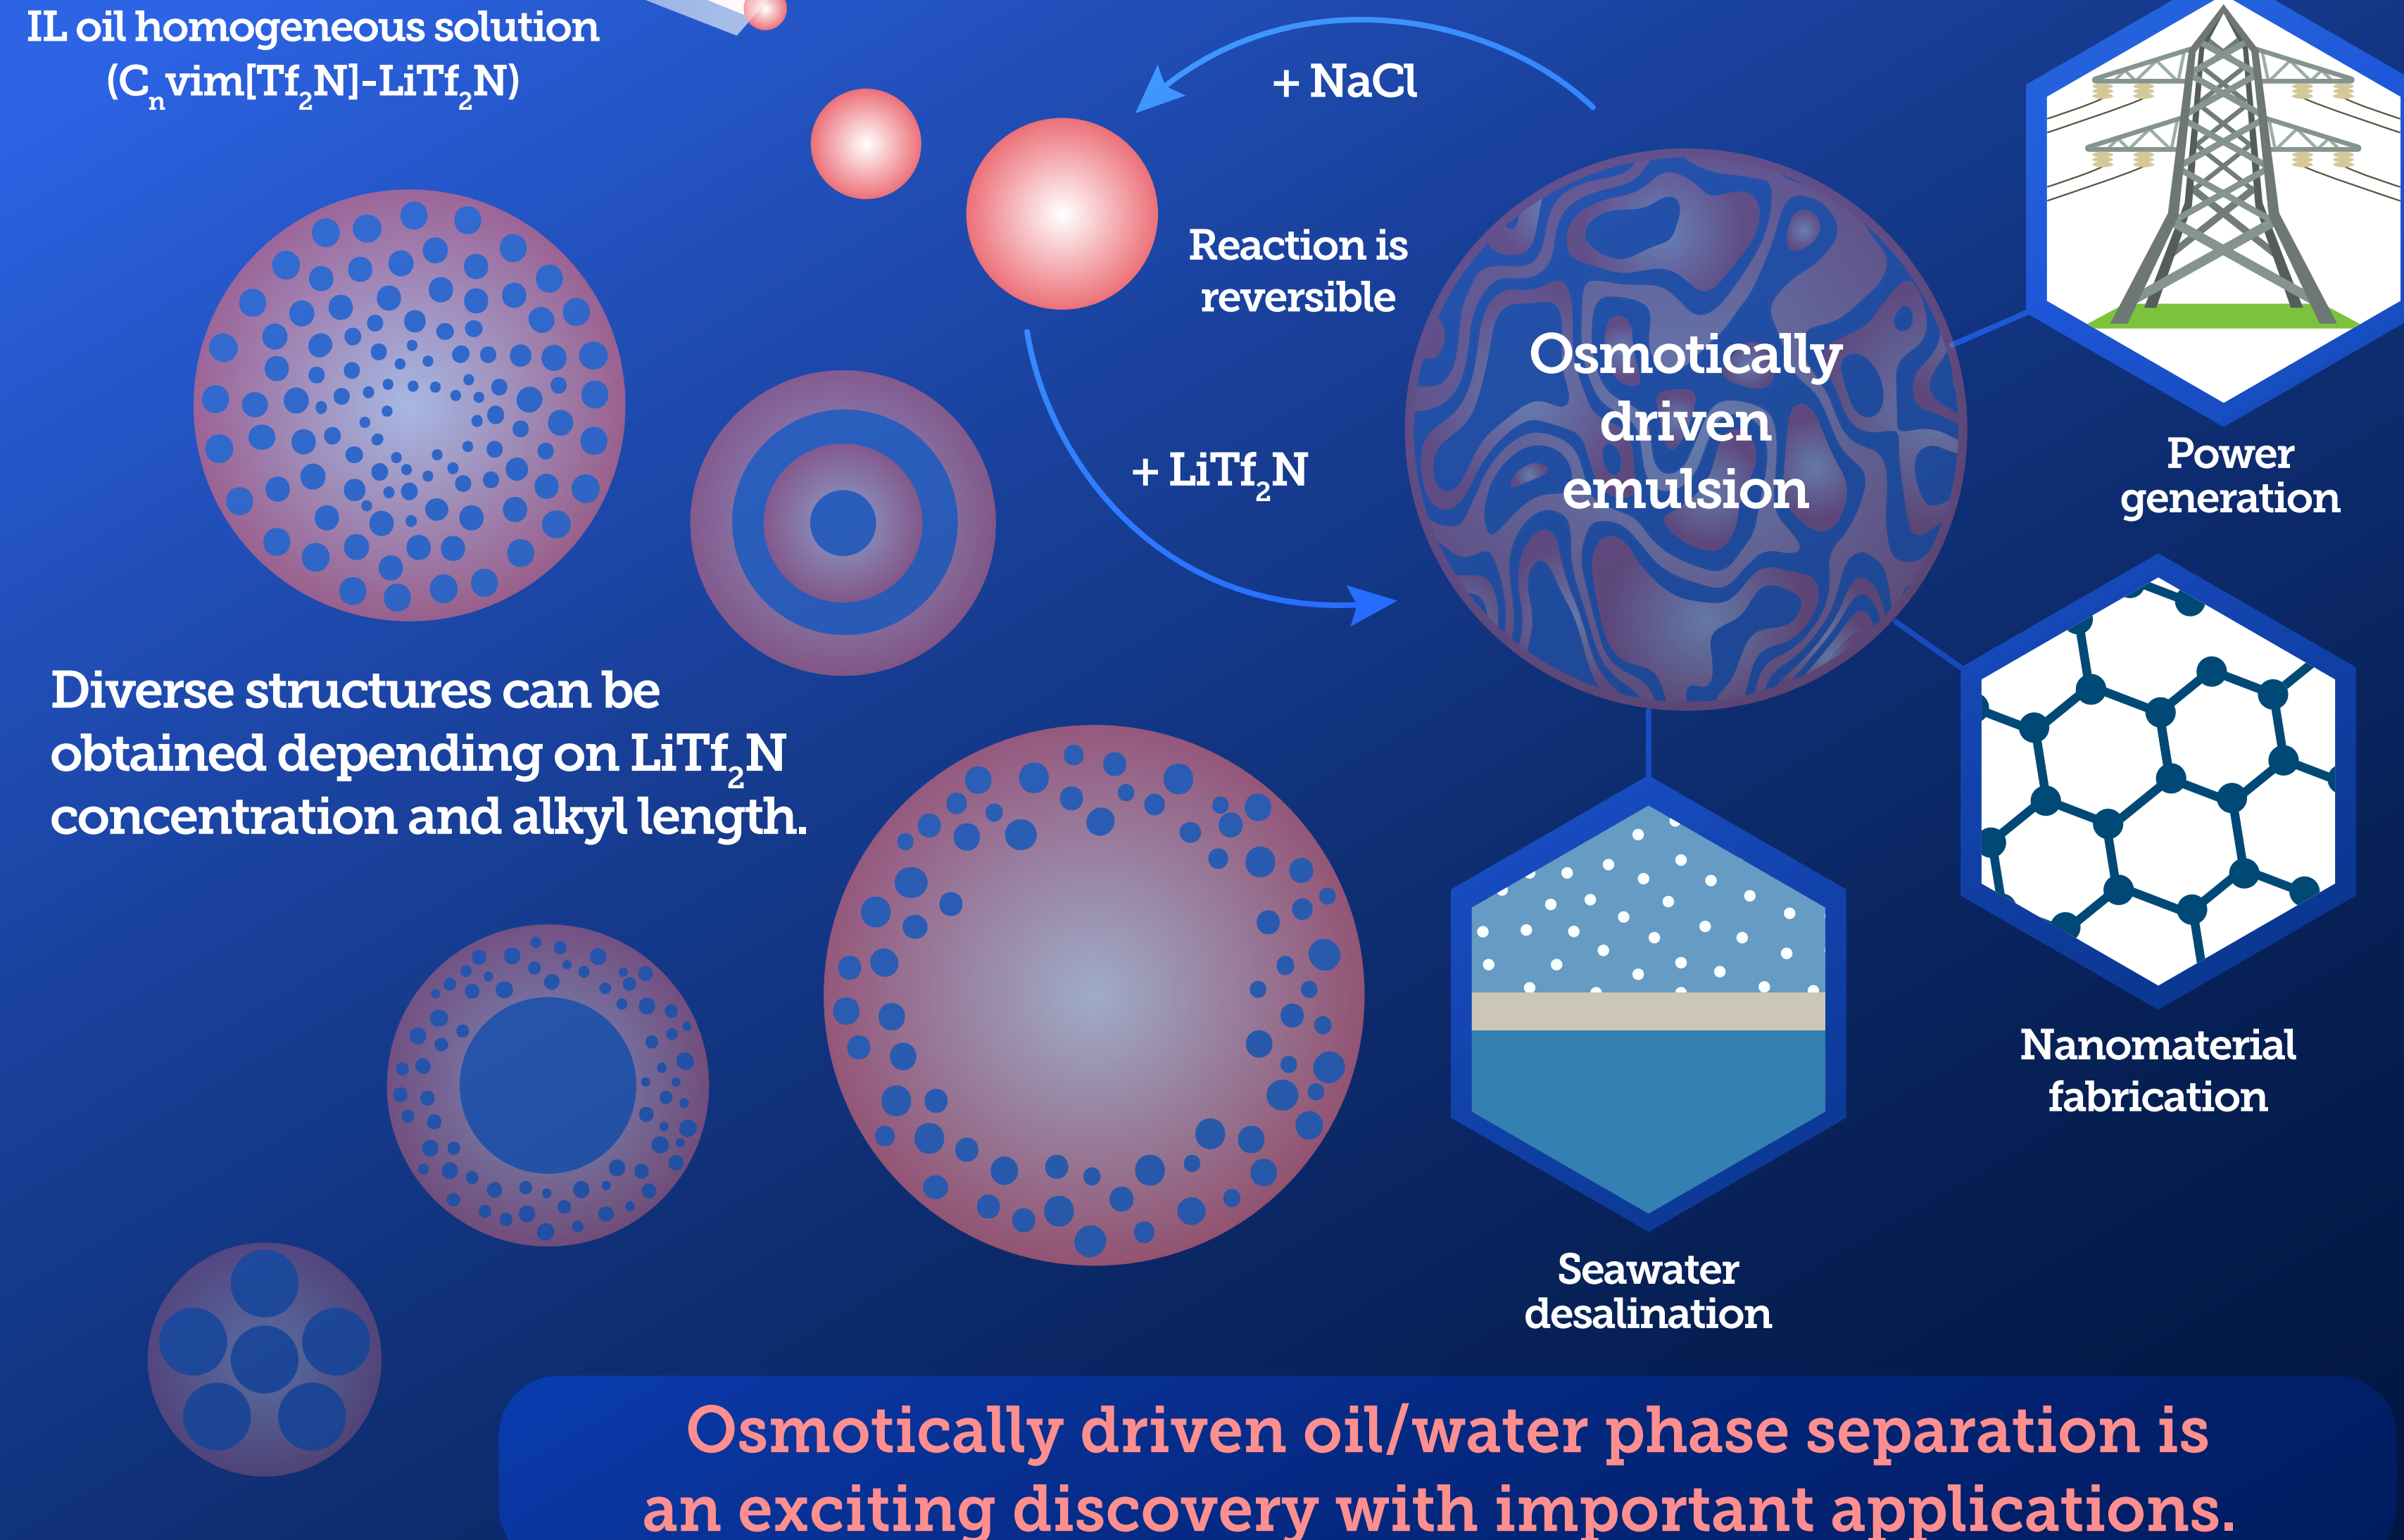

Chemical  
Science

PICK  
OF THE  
WEEK

Observation of osmotically driven, highly controllable and reconfigurable oil/water phase separation  
Li et al (2019) DOI: 10.1039/C9SC01649J

ROYAL SOCIETY  
OF CHEMISTRY
